# Supplementary material for: Virus Inactivation in Water Using Laser-Induced Graphene Filters
Source: MDPI journal article supplement (doi:10.3390/ma14123179), 2021-06-09
Supplement: s1 [file s1]

# Virus Inactivation in Water Using Laser-Induced Graphene Filters

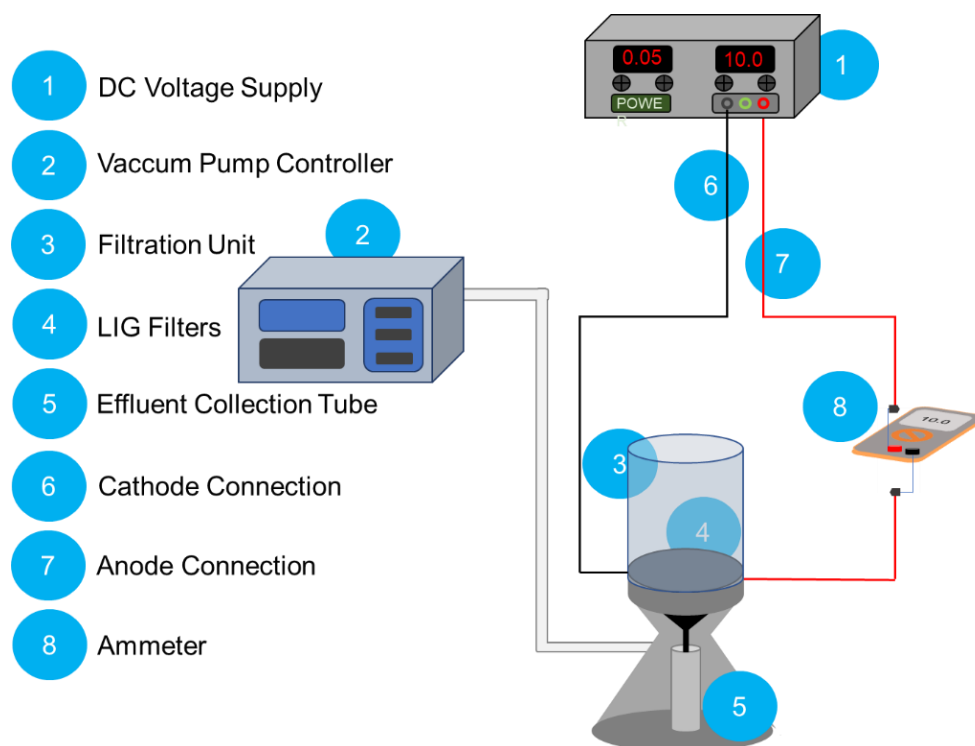

**Figure S1.** Experimental setup for filtration experiments.

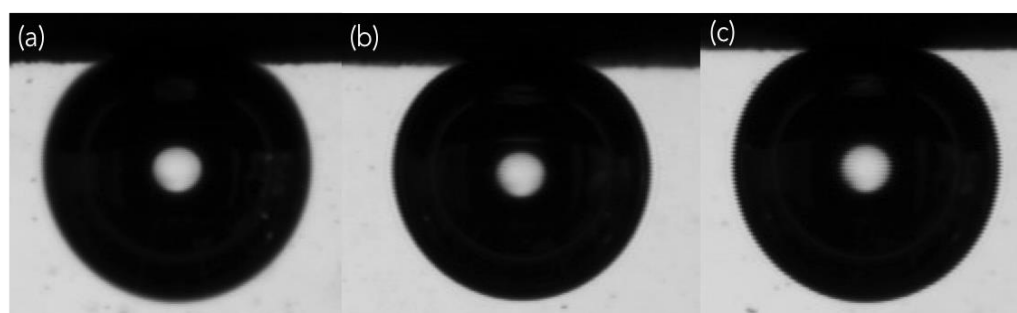

**Figure S2.** Contact-angle experiments using laser-induced graphene-poly(ethersulfone) (LIG-PES) membrane surfaces. (a) Unused LIG-PES electrode; the average contact angle was  $\Theta = 39.7 \pm 1.1^\circ$ . (b) Used upper/anodic LIG-PES electrode;  $\Theta = 30.5 \pm 2.4^\circ$ . (c) Used lower/cathodic LIG-PES electrode;  $\Theta = 28.4 \pm 0.9^\circ$ .

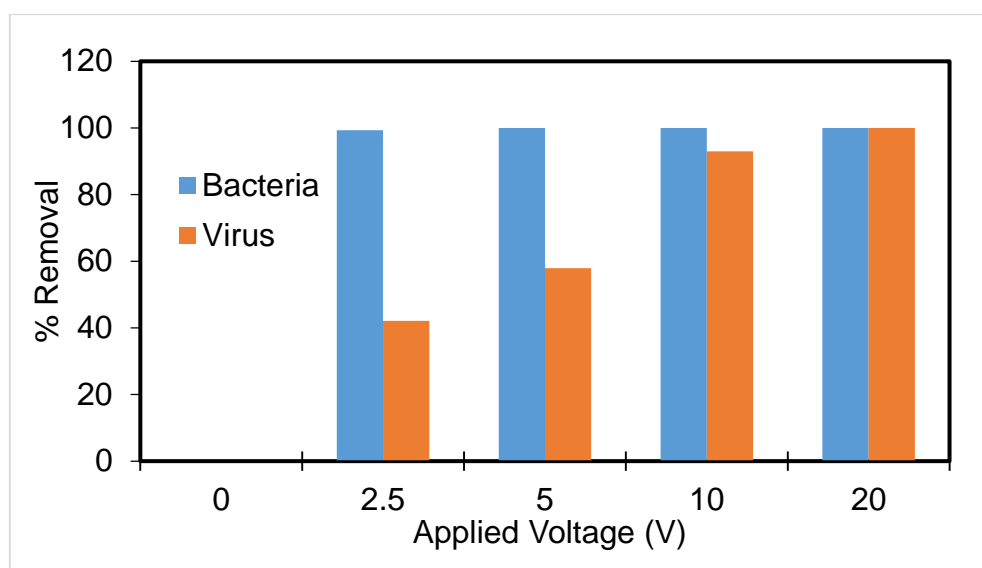

**Figure S3.** Comparative percentage removal of bacteria and viruses under the application of different electrical potential.

**Table S1.** Bacterial inactivation at a fixed vacuum pressure and varying laser-induced graphene (LIG) electrode configurations. Average flux with anode on top: 1810 L/m<sup>2</sup> h. Average flux with cathode on top: 1794 L/m<sup>2</sup>h.

| Electrode Configuration | Voltage (V) | Permeate Flux (L/m <sup>2</sup> h) | Percentage of Bacteria Killed | Log Removal |
|-------------------------|-------------|------------------------------------|-------------------------------|-------------|
| Anode-on-Top            | 2.5         | 1865                               | ~98.7                         | 1.9         |
|                         | 5.0         | 1722                               | > 99.99                       | > 4         |
|                         | 10.0        | 1865                               | > 99.99                       | > 4         |
|                         | 20.0        | 1790                               | > 99.99                       | > 4         |
| Cathode-on-Top          | 2.5         | 1790                               | ~95.4                         | 1.3         |
|                         | 5.0         | 1658                               | > 99.99                       | > 4         |
|                         | 10.0        | 1865                               | > 99.99                       | > 4         |
|                         | 20.0        | 1865                               | > 99.99                       | > 4         |

**Table S2.** Current-voltage relationship of LIG-PES electrodes.

| External Voltage (V) | Current (mA) |
|----------------------|--------------|
| 2.5                  | 6.3          |
| 5.0                  | 19.0         |
| 10.0                 | 53.8         |
| 20.0                 | 152.6        |
